## Ketamine Psychedelic and Antinociceptive Effects Are Connected: Erratum

In the Materials and Methods section under Data Collection (page 793), the sentence: “Data were collected before and during racemic ketamine infusion[,]” should be changed to: “Data were collected before and during both the racemic ketamine and S-ketamine infusions.”

The authors regret this error. The online version and PDF of the article have been corrected.

DOI: 10.1097/ALN.0000000000004281

### Reference

Olofsen E, Kamp J, Henthorn TK, van Velzen M, Niesters M, Sarton E, Dahan A: Ketamine psychedelic and antinociceptive effects are connected. *Anesthesiology* 2022; 136:792–801
